# Supplementary material for: A Molecularly Defined Skin Test Reagent for Bovine Tuberculosis Compatible With Vaccination Against Johne’s Disease
Source: Research Square preprint supplement (doi:10.21203/rs.3.rs-109463/v1), 2020-11-25
Supplement: Supplementary file 1 [file d5e622dc54c6a018b5e3b2ef.xlsx]

## Sheet: Suppl table 1
Supplemental table 1: Peptide pool details used for in vitro PBMC screening.
Pool	Antigen	Name	Amino acid sequence
1	Rv0445c	Peptide_001	MSRLSSILRAGAAFLVLGIA
1	Rv0445c	Peptide_002	RAGAAFLVLGIAAATFPQSA
1	Rv0445c	Peptide_003	LGIAAATFPQSAAADSTEDF
1	Rv0445c	Peptide_004	PQSAAADSTEDFPIPRRMIA
1	Rv0445c	Peptide_005	TEDFPIPRRMIATTCDAEQY
1	Rv0445c	Peptide_006	RMIATTCDAEQYLAAVRDTS
1	Rv0445c	Peptide_007	AEQYLAAVRDTSPVYYQRYM
1	Rv0445c	Peptide_008	RDTSPVYYQRYMIDFNNHAN
1	Rv0445c	Peptide_009	QRYMIDFNNHANLQQATINK
1	Rv0445c	Peptide_010	NHANLQQATINKAHWFFSLS
1	Rv0445c	Peptide_011	TINKAHWFFSLSPAERRDYS
1	Rv0445c	Peptide_012	FSLSPAERRDYSEHFYNGDP
1	Rv0445c	Peptide_013	RDYSEHFYNGDPLTFAWVNH
1	Rv0445c	Peptide_014	NGDPLTFAWVNHMKIFFNNK
1	Rv0445c	Peptide_015	WVNHMKIFFNNKGVVAKGTE
1	Rv0445c	Peptide_016	FNNKGVVAKGTEVCNGYPAG
1	Rv0445c	Peptide_017	KGTEVCNGYPAGDMSVWNWA
2	Rv1038c	Peptide_001	MASRFMTDPHAMRDMAGRFE
2	Rv1038c	Peptide_002	PHAMRDMAGRFEVHAQTVED
2	Rv1038c	Peptide_003	GRFEVHAQTVEDEARRMWAS
2	Rv1038c	Peptide_004	TVEDEARRMWASAQNISGAG
2	Rv1038c	Peptide_005	MWASAQNISGAGWSGMAEAT
2	Rv1038c	Peptide_006	SGAGWSGMAEATSLDTMTQM
2	Rv1038c	Peptide_007	AEATSLDTMTQMNQAFRNIV
2	Rv1038c	Peptide_008	MTQMNQAFRNIVNMLHGVRD
2	Rv1038c	Peptide_009	RNIVNMLHGVRDGLVRDANN
2	Rv1038c	Peptide_010	GVRDGLVRDANNYEQQEQAS
2	Rv1038c	Peptide_011	VRDANNYEQQEQASQQILSS
3	Rv1195	Peptide_001	VSFVMAYPEMLAAAADTLQS
3	Rv1195	Peptide_002	EMLAAAADTLQSIGATTVAS
3	Rv1195	Peptide_003	TLQSIGATTVASNAAAAAPT
3	Rv1195	Peptide_004	TVASNAAAAAPTTGVVPPAA
3	Rv1195	Peptide_005	AAPTTGVVPPAADEVSALTA
3	Rv1195	Peptide_006	PPAADEVSALTAAHFAAHAA
3	Rv1195	Peptide_007	ALTAAHFAAHAAMYQSVSAR
3	Rv1195	Peptide_008	AHAAMYQSVSARAAAIHDQF
3	Rv1195	Peptide_009	VSARAAAIHDQFVATLASSA
3	Rv1195	Peptide_010	HDQFVATLASSASSYAATEV
3	Rv1195	Peptide_011	LASSASSYAATEVANAAAAS
4	Rv1197	Peptide_001	MASRFMTDPHAMRDMAGRFE
4	Rv1197	Peptide_002	PHAMRDMAGRFEVHAQTVED
4	Rv1197	Peptide_003	GRFEVHAQTVEDEARRMWAS
4	Rv1197	Peptide_004	TVEDEARRMWASAQNISGAG
4	Rv1197	Peptide_005	MWASAQNISGAGWSGMAEAT
4	Rv1197	Peptide_006	SGAGWSGMAEATSLDTMTQM
4	Rv1197	Peptide_007	AEATSLDTMTQMNQAFRNIV
4	Rv1197	Peptide_008	MTQMNQAFRNIVNMLHGVRD
4	Rv1197	Peptide_009	RNIVNMLHGVRDGLVRDANN
4	Rv1197	Peptide_010	GVRDGLVRDANNYEQQEQAS
4	Rv1197	Peptide_011	VRDANNYEQQEQASQQILSS
5	Rv1253	Peptide_001	MAFPEYSPAASAATFADLQI
5	Rv1253	Peptide_002	AASAATFADLQIHPRVLRAI
5	Rv1253	Peptide_003	DLQIHPRVLRAIGDVGYESP
5	Rv1253	Peptide_004	LRAIGDVGYESPTAIQAATI
5	Rv1253	Peptide_005	YESPTAIQAATIPALMAGSD
5	Rv1253	Peptide_006	AATIPALMAGSDVVGLAQTG
5	Rv1253	Peptide_007	AGSDVVGLAQTGTGKTAAFA
5	Rv1253	Peptide_008	AQTGTGKTAAFAIPMLSKID
5	Rv1253	Peptide_009	AAFAIPMLSKIDITSKVPQA
5	Rv1253	Peptide_010	SKIDITSKVPQALVLVPTRE
5	Rv1253	Peptide_011	VPQALVLVPTRELALQVAEA
5	Rv1253	Peptide_012	PTRELALQVAEAFGRYGAYL
5	Rv1253	Peptide_013	VAEAFGRYGAYLSQLNVLPI
5	Rv1253	Peptide_014	GAYLSQLNVLPIYGGSSYAV
5	Rv1253	Peptide_015	VLPIYGGSSYAVQLAGLRRG
5	Rv1253	Peptide_016	SYAVQLAGLRRGAQVVVGTP
5	Rv1253	Peptide_017	LRRGAQVVVGTPGRVIDHLE
5	Rv1253	Peptide_018	VGTPGRVIDHLERATLDLSR
5	Rv1253	Peptide_019	DHLERATLDLSRVDFLVLDE
5	Rv1253	Peptide_020	DLSRVDFLVLDEADEMLTMG
5	Rv1253	Peptide_021	VLDEADEMLTMGFADDVERI
5	Rv1253	Peptide_022	LTMGFADDVERILSETPEYK
5	Rv1253	Peptide_023	VERILSETPEYKQVALFSAT
5	Rv1253	Peptide_024	PEYKQVALFSATMPPAIRKL
5	Rv1253	Peptide_025	FSATMPPAIRKLSAKYLHDP
5	Rv1253	Peptide_026	IRKLSAKYLHDPFEVTCKAK
5	Rv1253	Peptide_027	LHDPFEVTCKAKTAVAENIS
5	Rv1253	Peptide_028	CKAKTAVAENISQSYIQVAR
5	Rv1253	Peptide_029	ENISQSYIQVARKMDALTRV
5	Rv1253	Peptide_030	QVARKMDALTRVLEVEPFEA
5	Rv1253	Peptide_031	LTRVLEVEPFEAMIVFVRTK
5	Rv1253	Peptide_032	PFEAMIVFVRTKQATEEIAE
5	Rv1253	Peptide_033	VRTKQATEEIAEKLRARGFS
5	Rv1253	Peptide_034	EIAEKLRARGFSAAAISGDV
5	Rv1253	Peptide_035	RGFSAAAISGDVPQAQRERT
5	Rv1253	Peptide_036	SGDVPQAQRERTITALRDGD
5	Rv1253	Peptide_037	RERTITALRDGDIDILVATD
5	Rv1253	Peptide_038	RDGDIDILVATDVAARGLDV
5	Rv1253	Peptide_039	VATDVAARGLDVERISHVLN
5	Rv1253	Peptide_040	GLDVERISHVLNYDIPHDTE
5	Rv1253	Peptide_041	HVLNYDIPHDTESYVHRIGR
5	Rv1253	Peptide_042	HDTESYVHRIGRTGRAGRSG
5	Rv1253	Peptide_043	RIGRTGRAGRSGAALIFVSP
5	Rv1253	Peptide_044	GRSGAALIFVSPRELHLLKA
5	Rv1253	Peptide_045	FVSPRELHLLKAIEKATRQT
5	Rv1253	Peptide_046	LLKAIEKATRQTLTEAQLPT
5	Rv1253	Peptide_047	TRQTLTEAQLPTVEDVNTQR
5	Rv1253	Peptide_048	QLPTVEDVNTQRVAKFADSI
5	Rv1253	Peptide_049	NTQRVAKFADSITNALGGPG
5	Rv1253	Peptide_050	ADSITNALGGPGIELFRRLV
5	Rv1253	Peptide_051	GGPGIELFRRLVEEYEREHD
5	Rv1253	Peptide_052	RRLVEEYEREHDVPMADIAA
5	Rv1253	Peptide_053	REHDVPMADIAAALAVQCRG
5	Rv1253	Peptide_054	DIAAALAVQCRGGEAFLMAP
5	Rv1253	Peptide_055	QCRGGEAFLMAPDPPLSRRN
5	Rv1253	Peptide_056	LMAPDPPLSRRNRDQRRDRP
5	Rv1253	Peptide_057	SRRNRDQRRDRPQRPKRRPD
5	Rv1253	Peptide_058	RDRPQRPKRRPDLTTYRVAV
5	Rv1253	Peptide_059	RRPDLTTYRVAVGKRHKIGP
5	Rv1253	Peptide_060	RVAVGKRHKIGPGAIVGAIA
5	Rv1253	Peptide_061	KIGPGAIVGAIANEGGLHRS
5	Rv1253	Peptide_062	GAIANEGGLHRSDFGQIRIG
5	Rv1253	Peptide_063	LHRSDFGQIRIGPDFSLVEL
5	Rv1253	Peptide_064	IRIGPDFSLVELPAKLPRAT
5	Rv1253	Peptide_065	LVELPAKLPRATLKKLAQTR
5	Rv1253	Peptide_066	PRATLKKLAQTRISGVLIDL
5	Rv1253	Peptide_067	AQTRISGVLIDLRPYRPPDA
5	Rv1253	Peptide_068	LIDLRPYRPPDAARRHNGGK
5	Rv1253	Peptide_069	RPPDAARRHNGGKPRRKHVG
6	Rv1387	Peptide_001	MTEPWIAFPPEVHSAMLNYG
6	Rv1387	Peptide_002	PPEVHSAMLNYGAGVGPMLI
6	Rv1387	Peptide_003	LNYGAGVGPMLISATQNGEL
6	Rv1387	Peptide_004	PMLISATQNGELSAQYAEAA
6	Rv1387	Peptide_005	NGELSAQYAEAASEVEELLG
6	Rv1387	Peptide_006	AEAASEVEELLGVVASEGWQ
6	Rv1387	Peptide_007	ELLGVVASEGWQGQAAEAFV
6	Rv1387	Peptide_008	EGWQGQAAEAFVAAYMPFLA
6	Rv1387	Peptide_009	EAFVAAYMPFLAWLIQASAD
6	Rv1387	Peptide_010	PFLAWLIQASADCVEMAAQQ
6	Rv1387	Peptide_011	ASADCVEMAAQQHAVIEAYT
6	Rv1387	Peptide_012	AAQQHAVIEAYTAAVELMPT
6	Rv1387	Peptide_013	EAYTAAVELMPTQVELAANQ
6	Rv1387	Peptide_014	LMPTQVELAANQIKLAVLVA
6	Rv1387	Peptide_015	AANQIKLAVLVATNFFGINT
6	Rv1387	Peptide_016	VLVATNFFGINTIPIAINEA
6	Rv1387	Peptide_017	GINTIPIAINEAEYVEMWVR
6	Rv1387	Peptide_018	INEAEYVEMWVRAATTMATY
6	Rv1387	Peptide_019	MWVRAATTMATYSTVSRSAL
6	Rv1387	Peptide_020	MATYSTVSRSALSAMPHTSP
6	Rv1387	Peptide_021	RSALSAMPHTSPPPLILKSD
6	Rv1387	Peptide_022	HTSPPPLILKSDELLPDTGE
6	Rv1387	Peptide_023	LKSDELLPDTGEDSDEDGHN
6	Rv1387	Peptide_024	DTGEDSDEDGHNHGGHSHGG
6	Rv1387	Peptide_025	DGHNHGGHSHGGHARMIDNF
6	Rv1387	Peptide_026	SHGGHARMIDNFFAEILRGV
6	Rv1387	Peptide_027	IDNFFAEILRGVSAGRIVWD
6	Rv1387	Peptide_028	LRGVSAGRIVWDPVNGTLNG
6	Rv1387	Peptide_029	IVWDPVNGTLNGLDYDDYVY
6	Rv1387	Peptide_030	TLNGLDYDDYVYPGHAIWWL
6	Rv1387	Peptide_031	DYVYPGHAIWWLARGLEFFQ
6	Rv1387	Peptide_032	IWWLARGLEFFQDGEQFGEL
6	Rv1387	Peptide_033	EFFQDGEQFGELLFTNPTGA
6	Rv1387	Peptide_034	FGELLFTNPTGAFQFLLYVV
6	Rv1387	Peptide_035	PTGAFQFLLYVVVVDLPTHI
6	Rv1387	Peptide_036	LYVVVVDLPTHIAQIATWLG
6	Rv1387	Peptide_037	PTHIAQIATWLGQYPQLLSA
6	Rv1387	Peptide_038	TWLGQYPQLLSAALTGVIAH
6	Rv1387	Peptide_039	LLSAALTGVIAHLGAITGLA
6	Rv1387	Peptide_040	VIAHLGAITGLAGLSGLSAI
6	Rv1387	Peptide_041	TGLAGLSGLSAIPSAAIPAV
6	Rv1387	Peptide_042	LSAIPSAAIPAVVPELTPVA
6	Rv1387	Peptide_043	IPAVVPELTPVAAAPPMLAV
6	Rv1387	Peptide_044	TPVAAAPPMLAVAGVGPAVA
6	Rv1387	Peptide_045	MLAVAGVGPAVAAPGMLPAS
6	Rv1387	Peptide_046	PAVAAPGMLPASAPAPAAAA
6	Rv1387	Peptide_047	LPASAPAPAAAAGATAAGPT
6	Rv1387	Peptide_048	AAAAGATAAGPTPPATGFGG
6	Rv1387	Peptide_049	AGPTPPATGFGGFPPYLVGG
6	Rv1387	Peptide_050	GFGGFPPYLVGGGGPGIGFG
6	Rv1387	Peptide_051	LVGGGGPGIGFGSGQSAHAK
6	Rv1387	Peptide_052	IGFGSGQSAHAKAAASDSAA
6	Rv1387	Peptide_053	AHAKAAASDSAAAESAAQAS
6	Rv1387	Peptide_054	DSAAAESAAQASARAQARAA
6	Rv1387	Peptide_055	AQASARAQARAARRGRSAAK
6	Rv1387	Peptide_056	ARAARRGRSAAKARGHRDEF
6	Rv1387	Peptide_057	SAAKARGHRDEFVTMDMGFD
6	Rv1387	Peptide_058	RDEFVTMDMGFDAAAPAPEH
6	Rv1387	Peptide_059	MGFDAAAPAPEHQPGARASD
6	Rv1387	Peptide_060	APEHQPGARASDCGAGPIGF
6	Rv1387	Peptide_061	RASDCGAGPIGFAGTVRKEA
6	Rv1387	Peptide_062	PIGFAGTVRKEAVVKAAGLT
6	Rv1387	Peptide_063	RKEAVVKAAGLTTLAGDDFG
6	Rv1387	Peptide_064	AGLTTLAGDDFGGGPTMPMM
6	Rv1387	Peptide_065	DDFGGGPTMPMMPGTWTHDQ
6	Rv1387	Peptide_066	TMPMMPGTWTHDQGVFDEHR
7	Rv1789	Peptide_001	MDFGALPPEVNSVRMYAGPG
7	Rv1789	Peptide_002	EVNSVRMYAGPGSAPMVAAA
7	Rv1789	Peptide_003	AGPGSAPMVAAASAWNGLAA
7	Rv1789	Peptide_004	VAAASAWNGLAAELSSAATG
7	Rv1789	Peptide_005	GLAAELSSAATGYETVITQL
7	Rv1789	Peptide_006	AATGYETVITQLSSEGWLGP
7	Rv1789	Peptide_007	ITQLSSEGWLGPASAAMAEA
7	Rv1789	Peptide_008	WLGPASAAMAEAVAPYVAWM
7	Rv1789	Peptide_009	MAEAVAPYVAWMSAAAAQAE
7	Rv1789	Peptide_010	VAWMSAAAAQAEQAATQARA
7	Rv1789	Peptide_011	AQAEQAATQARAAAAAFEAA
7	Rv1789	Peptide_012	QARAAAAAFEAAFAATVPPP
7	Rv1789	Peptide_013	FEAAFAATVPPPLIAANRAS
7	Rv1789	Peptide_014	VPPPLIAANRASLMQLISTN
7	Rv1789	Peptide_015	NRASLMQLISTNVFGQNTSA
7	Rv1789	Peptide_016	ISTNVFGQNTSAIAAAEAQY
7	Rv1789	Peptide_017	NTSAIAAAEAQYGEMWAQDS
7	Rv1789	Peptide_018	EAQYGEMWAQDSAAMYAYAG
7	Rv1789	Peptide_019	AQDSAAMYAYAGSSASASAV
7	Rv1789	Peptide_020	AYAGSSASASAVTPFSTPPQ
7	Rv1789	Peptide_021	ASAVTPFSTPPQIANPTAQG
7	Rv1789	Peptide_022	TPPQIANPTAQGTQAAAVAT
7	Rv1789	Peptide_023	TAQGTQAAAVATAAGTAQST
7	Rv1789	Peptide_024	AVATAAGTAQSTLTEMITGL
7	Rv1789	Peptide_025	AQSTLTEMITGLPNALQSLT
7	Rv1789	Peptide_026	ITGLPNALQSLTSPLLQSSN
7	Rv1789	Peptide_027	QSLTSPLLQSSNGPLSWLWQ
7	Rv1789	Peptide_028	QSSNGPLSWLWQILFGTPNF
7	Rv1789	Peptide_029	WLWQILFGTPNFPTSISALL
7	Rv1789	Peptide_030	TPNFPTSISALLTDLQPYAS
7	Rv1789	Peptide_031	SALLTDLQPYASFFYNTEGL
7	Rv1789	Peptide_032	PYASFFYNTEGLPYFSIGMG
7	Rv1789	Peptide_033	TEGLPYFSIGMGNNFIQAAK
7	Rv1789	Peptide_034	IGMGNNFIQAAKTLGLIGSA
7	Rv1789	Peptide_035	QAAKTLGLIGSAAPAAVAAA
7	Rv1789	Peptide_036	IGSAAPAAVAAAGDAAKGLP
7	Rv1789	Peptide_037	VAAAGDAAKGLPGLGGMLGG
7	Rv1789	Peptide_038	KGLPGLGGMLGGGPVAAGLG
7	Rv1789	Peptide_039	MLGGGPVAAGLGNAASVGKL
7	Rv1789	Peptide_040	AGLGNAASVGKLSVPPVWSG
7	Rv1789	Peptide_041	VGKLSVPPVWSGPLPGSVTP
7	Rv1789	Peptide_042	VWSGPLPGSVTPGAAPLPVS
7	Rv1789	Peptide_043	SVTPGAAPLPVSTVSAAPEA
7	Rv1789	Peptide_044	LPVSTVSAAPEAAPGSLLGG
7	Rv1789	Peptide_045	APEAAPGSLLGGLPLAGAGG
7	Rv1789	Peptide_046	LLGGLPLAGAGGAGAGPRYG
7	Rv1789	Peptide_047	GAGGAGAGPRYGFRPTVMAR
7	Rv1789	Peptide_048	GAGPRYGFRPTVMARPPFAG
8	Rv1792	Peptide_001	MASRFMTDPHAMRDMAGRFE
8	Rv1792	Peptide_002	PHAMRDMAGRFEVHAQTVED
8	Rv1792	Peptide_003	GRFEVHAQTVEDEARRMWAS
8	Rv1792	Peptide_004	TVEDEARRMWASAQNISGAG
8	Rv1792	Peptide_005	MWASAQNISGAGWSGQAEAT
8	Rv1792	Peptide_006	SGAGWSGQAEATSLDTMTQM
8	Rv1792	Peptide_007	AEATSLDTMTQMNQAFRNIV
8	Rv1792	Peptide_008	MTQMNQAFRNIVNMLHGVRD
8	Rv1792	Peptide_009	RNIVNMLHGVRDGLVRDANN
8	Rv1792	Peptide_010	GVRDGLVRDANNYEQQEQAS
8	Rv1792	Peptide_011	VRDANNYEQQEQASQQILSS
9	Rv1983	Peptide_001	VSFLVVVPEFLTSAAADVEN
9	Rv1983	Peptide_002	EFLTSAAADVENIGSTLRAA
9	Rv1983	Peptide_003	DVENIGSTLRAANAAAAAST
9	Rv1983	Peptide_004	LRAANAAAAASTTALAAAGA
9	Rv1983	Peptide_005	AASTTALAAAGADEVSAAVA
9	Rv1983	Peptide_006	AAGADEVSAAVAALFARFGQ
9	Rv1983	Peptide_007	AAVAALFARFGQEYQAVSAQ
9	Rv1983	Peptide_008	RFGQEYQAVSAQASAFHQQF
9	Rv1983	Peptide_009	VSAQASAFHQQFVQTLNSAS
9	Rv1983	Peptide_010	HQQFVQTLNSASGSYAAAEA
9	Rv1983	Peptide_011	NSASGSYAAAEATIASQLQT
9	Rv1983	Peptide_012	AAEATIASQLQTAQHDLLGA
9	Rv1983	Peptide_013	QLQTAQHDLLGAVNAPTETL
9	Rv1983	Peptide_014	LLGAVNAPTETLLGRPLIGD
9	Rv1983	Peptide_015	TETLLGRPLIGDGAPGTATS
9	Rv1983	Peptide_016	LIGDGAPGTATSPNGGAGGL
9	Rv1983	Peptide_017	TATSPNGGAGGLLYGNGGNG
9	Rv1983	Peptide_018	AGGLLYGNGGNGYSATASGV
9	Rv1983	Peptide_019	GGNGYSATASGVGGGAGGSA
9	Rv1983	Peptide_020	ASGVGGGAGGSAGLIGNGGA
9	Rv1983	Peptide_021	GGSAGLIGNGGAGGAGGPNA
9	Rv1983	Peptide_022	NGGAGGAGGPNAPGGAGGNG
9	Rv1983	Peptide_023	GPNAPGGAGGNGGWLLGNGG
9	Rv1983	Peptide_024	GGNGGWLLGNGGIGGPGGAS
9	Rv1983	Peptide_025	GNGGIGGPGGASSIPGMSGG
9	Rv1983	Peptide_026	GGASSIPGMSGGAGGTGGAT
9	Rv1983	Peptide_027	MSGGAGGTGGATGLLGWGAN
9	Rv1983	Peptide_028	GGATGLLGWGANGGAGGLGD
9	Rv1983	Peptide_029	WGANGGAGGLGDGVGVDRGT
9	Rv1983	Peptide_030	GLGDGVGVDRGTGGAGGRGG
9	Rv1983	Peptide_031	DRGTGGAGGRGGLLYGGYGV
9	Rv1983	Peptide_032	GRGGLLYGGYGVSGPGGDGR
9	Rv1983	Peptide_033	GYGVSGPGGDGRTVPLEIIH
9	Rv1983	Peptide_034	GDGRTVPLEIIHVTEPTVHA
9	Rv1983	Peptide_035	EIIHVTEPTVHANVNGGPTS
9	Rv1983	Peptide_036	TVHANVNGGPTSTILVDTGS
9	Rv1983	Peptide_037	GPTSTILVDTGSAGLVVSPE
9	Rv1983	Peptide_038	DTGSAGLVVSPEDVGGILGV
9	Rv1983	Peptide_039	VSPEDVGGILGVLHMGLPTG
9	Rv1983	Peptide_040	ILGVLHMGLPTGLSISGYSG
9	Rv1983	Peptide_041	LPTGLSISGYSGGLYYIFAT
9	Rv1983	Peptide_042	GYSGGLYYIFATYTTTVDFG
9	Rv1983	Peptide_043	IFATYTTTVDFGNGIVTAPT
9	Rv1983	Peptide_044	VDFGNGIVTAPTAVNVVLLS
9	Rv1983	Peptide_045	TAPTAVNVVLLSIPTSPFAI
9	Rv1983	Peptide_046	VLLSIPTSPFAISTYFSALL
9	Rv1983	Peptide_047	PFAISTYFSALLADPTTTPF
9	Rv1983	Peptide_048	SALLADPTTTPFEAYFGAVG
9	Rv1983	Peptide_049	TTPFEAYFGAVGVDGVLGVG
9	Rv1983	Peptide_050	GAVGVDGVLGVGPNAVGPGP
9	Rv1983	Peptide_051	LGVGPNAVGPGPSIPTMALP
9	Rv1983	Peptide_052	GPGPSIPTMALPGDLNQGVL
9	Rv1983	Peptide_053	MALPGDLNQGVLIDAPAGEL
9	Rv1983	Peptide_054	QGVLIDAPAGELVFGPNPLP
9	Rv1983	Peptide_055	AGELVFGPNPLPAPNVEVVG
9	Rv1983	Peptide_056	NPLPAPNVEVVGSPITTLYV
9	Rv1983	Peptide_057	EVVGSPITTLYVKIDGGTPI
9	Rv1983	Peptide_058	TLYVKIDGGTPIPVPSIIDS
9	Rv1983	Peptide_059	GTPIPVPSIIDSGGVTGTIP
9	Rv1983	Peptide_060	IIDSGGVTGTIPSYVIGSGT
9	Rv1983	Peptide_061	GTIPSYVIGSGTLPANTNIE
9	Rv1983	Peptide_062	GSGTLPANTNIEVYTSPGGD
9	Rv1983	Peptide_063	TNIEVYTSPGGDRLYAFNTN
9	Rv1983	Peptide_064	PGGDRLYAFNTNDYRPTVIS
9	Rv1983	Peptide_065	FNTNDYRPTVISSGLMNTGF
9	Rv1983	Peptide_066	TVISSGLMNTGFLPFRFQPV
9	Rv1983	Peptide_067	NTGFLPFRFQPVYIDYSPSG
9	Rv1983	Peptide_068	FQPVYIDYSPSGIGTTVFDH
9	Rv1983	Peptide_069	PVYIDYSPSGIGTTVFDHPA
10	Rv3017c	Peptide_001	VSQSMYSYPAMTANVGDMAG
10	Rv3017c	Peptide_002	PAMTANVGDMAGYTGTTQSL
10	Rv3017c	Peptide_003	DMAGYTGTTQSLGADIASER
10	Rv3017c	Peptide_004	TQSLGADIASERTAPSRACQ
10	Rv3017c	Peptide_005	ASERTAPSRACQGDLGMSHQ
10	Rv3017c	Peptide_006	RACQGDLGMSHQDWQAQWNQ
10	Rv3017c	Peptide_007	MSHQDWQAQWNQAMEALARA
10	Rv3017c	Peptide_008	QWNQAMEALARAYRRCRRAL
10	Rv3017c	Peptide_009	LARAYRRCRRALRQIGVLER
10	Rv3017c	Peptide_010	RRALRQIGVLERPVGDSSDC
10	Rv3017c	Peptide_011	VLERPVGDSSDCGTIRVGSF
10	Rv3017c	Peptide_012	SSDCGTIRVGSFRGRWLDPR
10	Rv3017c	Peptide_013	VGSFRGRWLDPRHAGPATAA
10	Rv3017c	Peptide_014	RGRWLDPRHAGPATAADAGD
11	Rv3444c	Peptide_001	MNADPVLSYNFDAIEYSVRQ
11	Rv3444c	Peptide_002	YNFDAIEYSVRQEIHTTAAR
11	Rv3444c	Peptide_003	SVRQEIHTTAARFNAALQEL
11	Rv3444c	Peptide_004	TAARFNAALQELRSQIAPLQ
11	Rv3444c	Peptide_005	LQELRSQIAPLQQLWTREAA
11	Rv3444c	Peptide_006	APLQQLWTREAAAAYHAEQL
11	Rv3444c	Peptide_007	REAAAAYHAEQLKWHQAASA
11	Rv3444c	Peptide_008	AEQLKWHQAASALNEILIDL
11	Rv3444c	Peptide_009	AASALNEILIDLGNAVRHGA
11	Rv3444c	Peptide_010	LIDLGNAVRHGADDVAHADR
11	Rv3444c	Peptide_011	RHGADDVAHADRRAAGAWAR
12	Rv3478	Peptide_001	VVDFGALPPEINSARMYAGP
12	Rv3478	Peptide_002	PEINSARMYAGPGSASLVAA
12	Rv3478	Peptide_003	YAGPGSASLVAAAKMWDSVA
12	Rv3478	Peptide_004	LVAAAKMWDSVASDLFSAAS
12	Rv3478	Peptide_005	DSVASDLFSAASAFQSVVWG
12	Rv3478	Peptide_006	SAASAFQSVVWGLTVGSWIG
12	Rv3478	Peptide_007	VVWGLTVGSWIGSSAGLMAA
12	Rv3478	Peptide_008	SWIGSSAGLMAAAASPYVAW
12	Rv3478	Peptide_009	LMAAAASPYVAWMSVTAGQA
12	Rv3478	Peptide_010	YVAWMSVTAGQAQLTAAQVR
12	Rv3478	Peptide_011	AGQAQLTAAQVRVAAAAYET
12	Rv3478	Peptide_012	AQVRVAAAAYETAYRLTVPP
12	Rv3478	Peptide_013	AYETAYRLTVPPPVIAENRT
12	Rv3478	Peptide_014	TVPPPVIAENRTELMTLTAT
12	Rv3478	Peptide_015	ENRTELMTLTATNLLGQNTP
12	Rv3478	Peptide_016	LTATNLLGQNTPAIEANQAA
12	Rv3478	Peptide_017	QNTPAIEANQAAYSQMWGQD
12	Rv3478	Peptide_018	NQAAYSQMWGQDAEAMYGYA
12	Rv3478	Peptide_019	WGQDAEAMYGYAATAATATE
12	Rv3478	Peptide_020	YGYAATAATATEALLPFEDA
12	Rv3478	Peptide_021	TATEALLPFEDAPLITNPGG
12	Rv3478	Peptide_022	FEDAPLITNPGGLLEQAVAV
12	Rv3478	Peptide_023	NPGGLLEQAVAVEEAIDTAA
12	Rv3478	Peptide_024	AVAVEEAIDTAAANQLMNNV
12	Rv3478	Peptide_025	DTAAANQLMNNVPQALQQLA
12	Rv3478	Peptide_026	MNNVPQALQQLAQPAQGVVP
12	Rv3478	Peptide_027	QQLAQPAQGVVPSSKLGGLW
12	Rv3478	Peptide_028	GVVPSSKLGGLWTAVSPHLS
12	Rv3478	Peptide_029	GGLWTAVSPHLSPLSNVSSI
12	Rv3478	Peptide_030	PHLSPLSNVSSIANNHMSMM
12	Rv3478	Peptide_031	VSSIANNHMSMMGTGVSMTN
12	Rv3478	Peptide_032	MSMMGTGVSMTNTLHSMLKG
12	Rv3478	Peptide_033	SMTNTLHSMLKGLAPAAAQA
12	Rv3478	Peptide_034	MLKGLAPAAAQAVETAAENG
12	Rv3478	Peptide_035	AAQAVETAAENGVWAMSSLG
12	Rv3478	Peptide_036	AENGVWAMSSLGSQLGSSLG
12	Rv3478	Peptide_037	SSLGSQLGSSLGSSGLGAGV
12	Rv3478	Peptide_038	SSLGSSGLGAGVAANLGRAA
12	Rv3478	Peptide_039	GAGVAANLGRAASVGSLSVP
12	Rv3478	Peptide_040	GRAASVGSLSVPPAWAAANQ
12	Rv3478	Peptide_041	LSVPPAWAAANQAVTPAARA
12	Rv3478	Peptide_042	AANQAVTPAARALPLTSLTS
12	Rv3478	Peptide_043	AARALPLTSLTSAAQTAPGH
12	Rv3478	Peptide_044	SLTSAAQTAPGHMLGGLPLG
12	Rv3478	Peptide_045	APGHMLGGLPLGHSVNAGSG
12	Rv3478	Peptide_046	LPLGHSVNAGSGINNALRVP
12	Rv3478	Peptide_047	AGSGINNALRVPARAYAIPR
12	Rv3478	Peptide_048	NNALRVPARAYAIPRTPAAG
13	Rv3810	Peptide_001	VPNRRRRKLSTAMSAVAALA
13	Rv3810	Peptide_002	LSTAMSAVAALAVASPCAYF
13	Rv3810	Peptide_003	AALAVASPCAYFLVYESTET
13	Rv3810	Peptide_004	CAYFLVYESTETTERPEHHE
13	Rv3810	Peptide_005	STETTERPEHHEFKQAAVLT
13	Rv3810	Peptide_006	EHHEFKQAAVLTDLPGELMS
13	Rv3810	Peptide_007	AVLTDLPGELMSALSQGLSQ
13	Rv3810	Peptide_008	ELMSALSQGLSQFGINIPPV
13	Rv3810	Peptide_009	GLSQFGINIPPVPSLTGSGD
13	Rv3810	Peptide_010	IPPVPSLTGSGDASTGLTGP
13	Rv3810	Peptide_011	GSGDASTGLTGPGLTSPGLT
13	Rv3810	Peptide_012	LTGPGLTSPGLTSPGLTSPG
13	Rv3810	Peptide_013	PGLTSPGLTSPGLTDPALTS
13	Rv3810	Peptide_014	TSPGLTDPALTSPGLTPTLP
13	Rv3810	Peptide_015	ALTSPGLTPTLPGSLAAPGT
13	Rv3810	Peptide_016	PTLPGSLAAPGTTLAPTPGV
13	Rv3810	Peptide_017	APGTTLAPTPGVGANPALTN
13	Rv3810	Peptide_018	TPGVGANPALTNPALTSPTG
13	Rv3810	Peptide_019	ALTNPALTSPTGATPGLTSP
13	Rv3810	Peptide_020	SPTGATPGLTSPTGLDPALG
13	Rv3810	Peptide_021	LTSPTGLDPALGGANEIPIT
13	Rv3810	Peptide_022	PALGGANEIPITTPVGLDPG
13	Rv3810	Peptide_023	IPITTPVGLDPGADGTYPIL
13	Rv3810	Peptide_024	LDPGADGTYPILGDPTLGTI
13	Rv3810	Peptide_025	YPILGDPTLGTIPSSPATTS
13	Rv3810	Peptide_026	LGTIPSSPATTSTGGGGLVN
13	Rv3810	Peptide_027	ATTSTGGGGLVNDVMQVANE
13	Rv3810	Peptide_028	GLVNDVMQVANELGASQAID
13	Rv3810	Peptide_029	VANELGASQAIDLLKGVLMP
13	Rv3810	Peptide_030	QAIDLLKGVLMPSIMQAVQN
13	Rv3810	Peptide_031	VLMPSIMQAVQNGGAAAPAA
13	Rv3810	Peptide_032	AVQNGGAAAPAASPPVPPIP
13	Rv3810	Peptide_033	APAASPPVPPIPAAAAVPPT
13	Rv3810	Peptide_034	PPIPAAAAVPPTDPITVPVA
15	Rv3616c	Peptide_001	MSRAFIIDPTISAIDGLYDL
15	Rv3616c	Peptide_002	PTISAIDGLYDLLGIGIPNQ
15	Rv3616c	Peptide_003	LYDLLGIGIPNQGGILYSSL
15	Rv3616c	Peptide_004	IPNQGGILYSSLEYFEKALE
15	Rv3616c	Peptide_005	YSSLEYFEKALEELAAAFPG
15	Rv3616c	Peptide_006	KALEELAAAFPGDGWLGSAA
15	Rv3616c	Peptide_007	AFPGDGWLGSAADKYAGKNR
15	Rv3616c	Peptide_008	GSAADKYAGKNRNHVNFFQE
15	Rv3616c	Peptide_009	GKNRNHVNFFQELADLDRQL
15	Rv3616c	Peptide_010	FFQELADLDRQLISLIHDQA
15	Rv3616c	Peptide_011	DRQLISLIHDQANAVQTTRD
15	Rv3616c	Peptide_012	HDQANAVQTTRDILEGAKKG
15	Rv3616c	Peptide_013	TTRDILEGAKKGLEFVRPVA
15	Rv3616c	Peptide_014	AKKGLEFVRPVAVDLTYIPV
15	Rv3616c	Peptide_015	RPVAVDLTYIPVVGHALSAA
15	Rv3616c	Peptide_016	YIPVVGHALSAAFQAPFCAG
15	Rv3616c	Peptide_017	LSAAFQAPFCAGAMAVVGGA
15	Rv3616c	Peptide_018	FCAGAMAVVGGALAYLAVKT
15	Rv3616c	Peptide_019	VGGALAYLAVKTLINATQLL
15	Rv3616c	Peptide_020	AVKTLINATQLLKLLAKLAE
15	Rv3616c	Peptide_021	TQLLKLLAKLAELVAAAIAD
15	Rv3616c	Peptide_022	KLAELVAAAIADIISDVADI
15	Rv3616c	Peptide_023	AIADIISDVADIIKGILGEV
15	Rv3616c	Peptide_024	VADIIKGILGEVWEFITNAL
15	Rv3616c	Peptide_025	LGEVWEFITNALNGLKELWD
15	Rv3616c	Peptide_026	TNALNGLKELWDKLTGWVTG
15	Rv3616c	Peptide_027	ELWDKLTGWVTGLFSRGWSN
15	Rv3616c	Peptide_028	WVTGLFSRGWSNLESFFAGV
15	Rv3616c	Peptide_029	GWSNLESFFAGVPGLTGATS
15	Rv3616c	Peptide_030	FAGVPGLTGATSGLSQVTGL
15	Rv3616c	Peptide_031	GATSGLSQVTGLFGAAGLSA
15	Rv3616c	Peptide_032	VTGLFGAAGLSASSGLAHAD
15	Rv3616c	Peptide_033	GLSASSGLAHADSLASSASL
15	Rv3616c	Peptide_034	AHADSLASSASLPALAGIGG
15	Rv3616c	Peptide_035	SASLPALAGIGGGSGFGGLP
15	Rv3616c	Peptide_036	GIGGGSGFGGLPSLAQVHAA
15	Rv3616c	Peptide_037	GGLPSLAQVHAASTRQALRP
15	Rv3616c	Peptide_038	VHAASTRQALRPRADGPVGA
15	Rv3616c	Peptide_039	ALRPRADGPVGAAAEQVGGQ
15	Rv3616c	Peptide_040	PVGAAAEQVGGQSQLVSAQG
15	Rv3616c	Peptide_041	VGGQSQLVSAQGSQGMGGPV
15	Rv3616c	Peptide_042	SAQGSQGMGGPVGMGGMHPS
15	Rv3616c	Peptide_043	GGPVGMGGMHPSSGASKGTT
15	Rv3616c	Peptide_044	MHPSSGASKGTTTKKYSEGA
15	Rv3616c	Peptide_045	KGTTTKKYSEGAAAGTEDAE
15	Rv3616c	Peptide_046	SEGAAAGTEDAERAPVEADA
15	Rv3616c	Peptide_047	EDAERAPVEADAGGGQKVLV
15	Rv3616c	Peptide_048	RAPVEADAGGGQKVLVRNVV

## Sheet: Suppl table 2
Supplemental table 2: Peptide pool details used for in vivo skin testing.
Pool	Antigen	Amino acid sequence
Rv3616c(Gen)	Rv3616c	MSRAFIIDPTISAIDGLYDLLGIGIPNQGGILYSSLEYFE
Rv3616c(Gen)	Rv3616c	LGIGIPNQGGILYSSLEYFEKALEELAAAFPGDGWLGSAA
Rv3616c(Gen)	Rv3616c	KALEELAAAFPGDGWLGSAADKYAGKNRNHVNFFQELADL
Rv3616c(Gen)	Rv3616c	DKYAGKNRNHVNFFQELADLDRQLISLIHDQANAVQTTRD
Rv3616c(Gen)	Rv3616c	DRQLISLIHDQANAVQTTRDILEGAKKGLEFVRPVAVDLT
Rv3616c(Gen)	Rv3616c	ILEGAKKGLEFVRPVAVDLTYIPVVGHALSAAFQAPFCAG
Rv3616c(Gen)	Rv3616c	YIPVVGHALSAAFQAPFCAGAMAVVGGALAYLVVKTLINA
Rv3616c(Gen)	Rv3616c	IISDVADIIKGTLGEVWEFITNALNGLKELWDKLTGWVTG
Rv3616c(Gen)	Rv3616c	TNALNGLKELWDKLTGWVTGLFSRGWSNLESFFAGVPGLT
Rv3616c(Gen)	Rv3616c	GATSGLSQVTGLFGAAGLSASSGLAHADSLASSASLPALA
Rv3616c(Gen)	Rv3616c	SSGLAHADSLASSASLPALAGIGGGSGFGGLPSLAQVHAA
Rv3616c(Gen)	Rv3616c	GIGGGSGFGGLPSLAQVHAASTRQALRPRADGPVGAAAEQ
Rv3616c(Gen)	Rv3616c	STRQALRPRADGPVGAAAEQVGGQSQLVSAQGSQGMGGPV
Rv3616c(Gen)	Rv3616c	VGGQSQLVSAQGSQGMGGPVGMGGMHPSSGASKGTTTKKY
Rv3616c(Gen)	Rv3616c	GMGGMHPSSGASKGTTTKKYSEGAAAGTEDAERAPVEADA
Rv3616c(Gen)	Rv3616c	KGTTTKKYSEGAAAGTEDAERAPVEADAGGGQKVLVRNVV
Rv3616c(Gen)	Rv3616c	AMAVVGGALAYLVVKTLINATQLLK
Rv3616c(Gen)	Rv3616c	VKTLINATQLLKLLAKLAELVAAAI
Rv3616c(Gen)	Rv3616c	LAKLAELVAAAIADIISDVADIIKG
Rv3616c(Gen)	Rv3616c	ESFAGVPGLTGATSGLSQVT
